# Clade GR and Clade GH Isolates in Asia Show Highest Amount of SNPs

Antara Sengupta<sup>a,\*</sup>, Sk. Sarif Hassan<sup>b</sup>, Pabitra Pal Choudhury<sup>c</sup>

<sup>a</sup>*Department of Computer Science and Engineering, University of Calcutta, West Bengal, India*

<sup>b</sup>*Department of Mathematics, Pingla Thana Mahavidyalaya, Maligram, Paschim Medinipur, West Bengal, India*

<sup>c</sup>*Applied Statistics Unit, Indian Statistical Institute, Kolkata, West Bengal, India*

---

## Abstract

Clades are monophyletic groups composed of a common ancestor and all its lineal descendants. As the propensity of virulence of a disease depends upon the type of clade the virus belongs to and it causes different fatality rates of disease in different countries, so the clade-wise analysis of SARS-CoV-2 isolates collected from different countries can illuminate the actual evolutionary relationships between them. In this study, 1566 SARS-CoV-2 genome sequences across ten Asian countries are collected, clustered and characterized based on the clade they belong to. The isolates are compared to the Wuhan reference sequence (Accession no: *MN996528.1*) to identify the mutations that occurred at different protein regions. Structural changes in amino acids due to mutations lead to functional instability of the proteins. Detailed clade-wise functional assessments are carried out to quantify the stability and vulnerability of the mutations occurring in SARS-CoV-2 genomes which can shade light on personalized prevention and treatment of the disease and encourage towards the invention of clade-specific vaccines.

*Keywords:* COVID-19, clades, SARS-CoV-2, deleterious mutations, Asia

---

## 1. Introduction

1 Viruses have a remarkable capacity to adapt to new hosts and environments [1]. Mutations may  
2 lead to different phenotypic changes in them, which may lead to occur biodiversity. Phylogenies are  
3 frameworks for analysing biodiversity. Phylogenetic analysis based on sequence similarity is one of the  
4 very efficient way to do so [2]. However, it will be worth noting that due to the recent outbreak of  
5 pandemic COVID-19, people around the world are trying by every means to reach the origin, to get some  
6 ways of prevention and therapeutic pathways. Biodiversity is characterized by a continual replacement  
7 of branches in the tree of life, i.e. clade. [3]. Evolutionary pressure on host immunodeficiency leads  
8 to different clades of viruses [4]. A clade is a group of highly related sequences that share a common  
9 ancestor. They can provide hypotheses about the actual evolutionary history of that group of sequences.  
10 Some clinical studies suggest that the proclivity of virulence of a disease depends upon the type of clade  
11 the virus belongs to [4]. Clade differences can result in varying degrees of pathology. Millions of gene  
12 regulatory elements are there which contribute heavily to the variation in gene expression of complex  
13 human traits and diseases [5]. Determining mutation types influence a lot in gene regulation and is  
14 important for studying the role of regulatory variation in evolution. Genomic evolution helps a virus to  
15 escape host immunity [6, 7]. The clade-wise analysis of SARS-CoV-2 isolates collected from different  
16 countries can shed a light on the actual evolutionary history of the region or continent. In order  
17 to confirm the hypothesis in COVID-19 pathogenesis, it is highly recommended to make a thorough  
18 study of mutations occurring in SARS-CoV-2 isolates collected from different demographic areas and  
19 characterizing them based on the clades they come from [8]. A plethora of papers already have been  
20 published, where researchers have tried to study the virus isolates of SARS-CoV-2, which is solely  
21 responsible for the disease to occur in human [9, 10, 11, 12, 13]. Huge numbers of investigations are  
22

---

\*Corresponding author

*Email addresses:* [antara.sngpt@gmail.com](mailto:antara.sngpt@gmail.com) (Antara Sengupta), [sarimif@gmail.com](mailto:sarimif@gmail.com) (Sk. Sarif Hassan), [pabitrpalchoudhury@gmail.com](mailto:pabitrpalchoudhury@gmail.com) (Pabitra Pal Choudhury)

23 reported in order to find evolutionary relationships between SARS-CoV-2 and other corona-viruses and  
24 to determine the origin and molecular characteristics of SARS-CoV-2 [14, 15, 16]. Several works are  
25 also done on characterization and comparative analysis of structured and non-structured proteins of  
26 SARS-CoV-2 [17, 18]. According to Hassan et.al. [19] among all the accessory proteins of SARS-CoV-2,  
27 ORF3a plays an important role in virus pathogenesis, as it possesses various mutations which are linked  
28 with that of spike proteins. Kumar et.al.stated the first observation on the deletion mutations in the C-  
29 terminal region of the envelope glycoprotein in India [20]. Some researchers have given more stresses on  
30 codon usage bias in SARS-CoV-2 rather than mutational trends [21]. Several investigations are carried  
31 out on characterizing the mutations of a particular country and even across the globe [22, 23, 24].  
32 Researchers aimed too to analyse SARS-CoV-2 proteins modulating host immune response like type  
33 I interferon pathways [25]. People have tried to uncover the relation between hotspot mutations and  
34 viral pathogenicity [26]. Some research papers focused on characterizing B and T cell epitopes of  
35 certain proteins of SARS-CoV-2 which can help in vaccine development [27]. Phylodynamic analyses  
36 of SARS-CoV-2 genomes can provide insights into the roles of some relevant factors to limit the spread  
37 of the disease [28]. SARS-CoV-2 is the seventh coronavirus to infect humans but the first HCoV which  
38 pandemic potential [29]. (Accession no:NC\_045512) is the first SARS-CoV-2 sample SARS-CoV-2  
39 sequence from Wuhan, and it is from clade 'O' [30]. Clade 'G' is the variant of the spike protein D614G  
40 which indicates significantly higher human host infectivity and better transmission efficiency to the  
41 virus. GH and GR are the most common offsprings of clade G. According to data from the public  
42 database of the Global Initiative on Sharing All Influenza Data (GISAID), three major clades of SARS-  
43 CoV-2 are clade G (variant of the spike protein S-D614G), clade V (a variant of the ORF3a coding  
44 protein NS3-G251), and clade S (variant ORF8-L84S) [30]. GR clade, carrying the combination of  
45 NSP3: F106F, Spike: D614G and Nucleocapsid: RG203KR mutations, whereas clade 'GH' represents  
46 the mutations NSP12b: P314L, S: D614G and ORF3a: Q57H. Different fatality rates observed in  
47 different countries may be the consequence of clade's differences in virulence. The spike protein of  
48 SARS-CoV-2 binds the host receptor angiotensin-converting enzyme 2 (ACE2) via receptor-binding  
49 domain (RBD). It is reported that immunization with SARS-CoV-2 receptor-binding domain (RBD)  
50 is able to induce clade-specific neutralizing antibodies in a host like mice [31]. In some cases vaccines  
51 are immunogenic and induced antibodies can neutralize homologous and heterogeneous viruses with  
52 different degrees of cross-reactivity [32]. Hence, in this present study, 1566 SARS-CoV-2 isolates from  
53 the Asian continent comprising 10 countries (India, Bangladesh, Pakistan, Srilanka, China, Japan,  
54 Malaysia, Iran, Thailand, and Saudi Arabia) are collected, clustered, and characterized based on the  
55 clade they belong to.

## 56 2. Methods and Materials

### 57 2.1. Collection of gene sequences of SARS-COV-2

58 One of the primary features of the investigation and analysis of the COVID-19 is availability of  
59 real-time data in global databases. To carry out the experiment We have collected 1566 isolates of  
60 SARS-CoV-2 from ten different Asian countries from the National Center for Biotechnology Informa-  
61 tion (NCBI) database (<https://www.nih.gov/coronavirus>) on October 20, 2020. The information about  
62 collected dataset are presented as Supplemental Materials in Table S1 and summarized in Table 1. In  
63 addition, we have collected the Reference Sequence (Accession no:MN996528.1) from the same Gene  
64 bank.However, information in detail about the dataset Collected sequences are then gone through pre-  
65 liminary screening for excluding noisy sequences. Here noise includes no mutations and the amino acid  
66 changes due to mutations specified by 'X'. Thus finally 1384 isolates are taken for further investigations.

### 67 2.2. Methods

68 The present work aims to make a clade-wise classification and analysis of SARS-CoV-2 isolates  
69 of ten Asian countries. The isolates of each country are then compared with the reference sequence  
70 to find out the mutations that occurred. Clade-wise clustering of the given dataset is taken place.  
71 The observed mutations are then gone through different online software tools to investigate different  
72 biological functionalities that may change and affect the variants due to mutations. Here it is to

Table 1: Collected SARS-CoV-2 genome sequences from COVID patients from ten different Asian Countries.

| Country Name | # Associated Isolate | #Isolate in work |
|--------------|----------------------|------------------|
| INDIA        | 570                  | 565              |
| THAILAND     | 227                  | 104              |
| BANGLADESH   | 231                  | 231              |
| IRAN         | 172                  | 119              |
| CHINA        | 189                  | 189              |
| JAPAN        | 96                   | 96               |
| SAUDI ARABIA | 58                   | 58               |
| PAKISTAN     | 10                   | 9                |
| MALAYSIA     | 9                    | 9                |
| SRILANKA     | 4                    | 4                |

Table 2: Clade-wise counting of isolates reported in 10 countries.

| COUNTRY      | G   | GH  | GR  | L  | S  | O  | V |
|--------------|-----|-----|-----|----|----|----|---|
| THAILAND     | 12  | 0   | 0   | 1  | 39 | 51 | 1 |
| BANGLADESH   | 6   | 13  | 208 | 1  | 1  | 2  | 0 |
| SRILANKA     | 1   | 0   | 1   | 0  | 0  | 2  | 0 |
| CHINA        | 2   | 0   | 1   | 64 | 48 | 71 | 3 |
| JAPAN        | 2   | 5   | 71  | 13 | 2  | 3  | 0 |
| INDIA        | 191 | 303 | 18  | 7  | 19 | 27 | 0 |
| IRAN         | 32  | 1   | 0   | 4  | 0  | 82 | 0 |
| MALYASIA     | 0   | 1   | 0   | 0  | 0  | 8  | 0 |
| PAKISTAN     | 0   | 1   | 5   | 2  | 0  | 1  | 0 |
| SAUDI ARABIA | 2   | 32  | 22  | 0  | 1  | 1  | 0 |

73 be noted that we have used two web-based software tools (PROVEAN [33] and I-mutant [34]) for the  
74 aforesaid functional assessments. I-Mutant is a suite developed based on Support Vector Machine(SVM).  
75 ( $\Delta\Delta G > -0.5$  Kcal/mol) indicates that the mutation can largely destabilize the protein,  $\Delta\Delta G > 0.5$   
76 Kcal/mol indicates about the strong stability and  $-0.5 \geq \Delta\Delta G \geq 0.5$  Kcal/mol tells about weak effect  
77 of mutations. Isolates with a score equal to or below  $-2.5$  are considered deleterious and scores above  
78  $-2.5$  are neutral. Lastly, we tracked the trend of mutations that occurred in the sequences of different  
79 clades.

### 80 3. Results and Discussions

#### 81 3.0.1. Clade-wise clustering of SARS-CoV-2 strains taken as dataset from different countries

82 After excluding the noisy sequences finally 1391 strains are found. Each strain belongs to a particular  
83 clade, so the isolates are clustered according to the clade from which they belong to. It has been observed  
84 that as a whole isolates of five clades (G, GH, GR, L, S, O, and V) are participated in those countries  
85 of the Asian continent. According to (Fig. 1) the order of the clade-wise participation of isolates is  
86  $GH > GR > O > G > S > L > V$ . It is to be noted here that among the entire dataset taken Indian isolates  
87 hold a big amount of data. According to the country-wise view shown in Table 2 SARS-CoV-2 isolates  
88 of clade 'O' are present in the dataset of all countries and isolates of clade 'V' have been circulated only  
89 at China and Thailand. The country-wise analysis has a mixed result. In Srilanka, Thailand, China,  
90 Malaysia, and Iran the isolates are majorly from clade 'O'. India and Saudi Arabia have a prevalence  
91 of clade 'GH'. Pakistan, Bangladesh, and Japan have the prevalence of clade 'GR'. It indicates viral  
92 diversity regarding infection as the infection is transmitting from one country to another. Remarkable  
93 viral diversities are also present even in different regions within a country too.

#### 94 3.1. Investigating trend of mutations in various clades

95 In this subsection firstly the positions of mutations are identified in each isolate and then it is  
96 aimed to calculate clade-wise percentage of mutations occurred in each country as shown in (Fig. 2).  
97 Secondly, a microscopic view has been given on clade-wise clustering of total mutations found in the  
98 whole dataset and calculating the protein-wise percentage of the mutations occurred according to the  
99 clades they belong to (Fig. 3).

100 According to (Fig. 2), India and Saudi Arabia have a prevalence of clade 'GH' (55.76%, and 53.69%  
101 respectively). Whereas, in Pakistan, Bangladesh, and Japan strains have a prevalence of clade 'GR'  
102 (60.66%, 92.33% and 88.06% respectively). Mutations have occurred in strains from Clade 'S' at

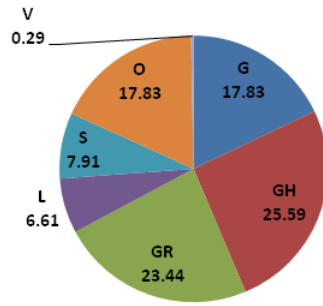

Figure 1: Calculate percentage of clades representing the isolates.

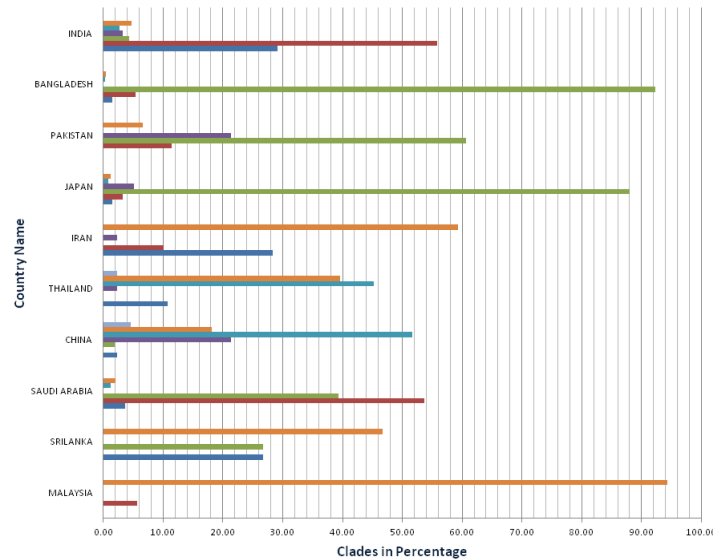

Figure 2: Calculating clade-wise percentage of mutations occurred in different countries.

103 China and Thailand (51.63% and 45% respectively). SARS-CoV-2 isolates of clade 'O' have significant  
 104 participations in Iran, Srilanka and Malaysia (59.31%, 46.67% and 94.29% respectively). SARS-CoV-2  
 105 isolates of clades G, GH, GR, S, L, and O are circulating in India and Japan. Whereas, clades V, O,  
 106 S, L, GR, and G are circulating at different regions of China and clades O, S, GR, GH, and G are  
 107 circulated in Saudi Arabia. In Malaysia (clades O and GH) and Srilanka (clades O, GR, and G) the  
 108 SARS-CoV-2 isolates do not have the viral diversities a lot.

109 Mutations refer to the virus to undergo certain changes which can lead to develop some new isolates  
 110 after replications. Non-synonymous substitutions play a very significant role as this type of mutation  
 111 makes change in amino acid. Alteration in amino acid causes structural change. With the aim of  
 112 understanding the trend of non-synonymous mutations in different clades in the context of disease  
 113 severity, a detailed protein-wise comparative analysis has been taken place. To do so we have considered  
 114 the total dataset as a whole. Clade-wise percentages of non-synonymous mutations at different protein  
 115 regions are calculated. The clade-wise characterization of mutations of different proteins are shown in  
 116 (Fig. 3).

117 According to the dataset taken, we have got 6665 numbers of non-synonymous mutations. We can  
 118 observe at Table 3 that the chronological order of clades at per number of mutations taken place in  
 119 whole dataset is GR>GH>G>O>S>L>V. It can be observed in (Fig. 3) that mutations are majorly  
 120 taken place at isolates of clades GH and GR which are 31.33% and 31.93% of respectively. Samples of  
 121 clade V have been affected rarely (0.29%). Clade-wise distribution of mutations in each protein does  
 122 not have a very similar trend(s). Although the majority of proteins mutated are either of clade GR  
 123 (N, NS7a, NSP2, NSP6, NSP13, and NSP15) or GH (M, NS3, NSP1, NSP12, NSP14, and NSP16) but  
 124 clade G also has large numbers of mutations in some proteins(S, NS6, and NSP11). Isolates of Clade L  
 125 and clade G here have got mutations maximum only in protein E and NSP4 respectively. In proteins  
 126 NS7b, NS8, and NSP7 of the isolates from clade S have maximum distributions of non-synonymous

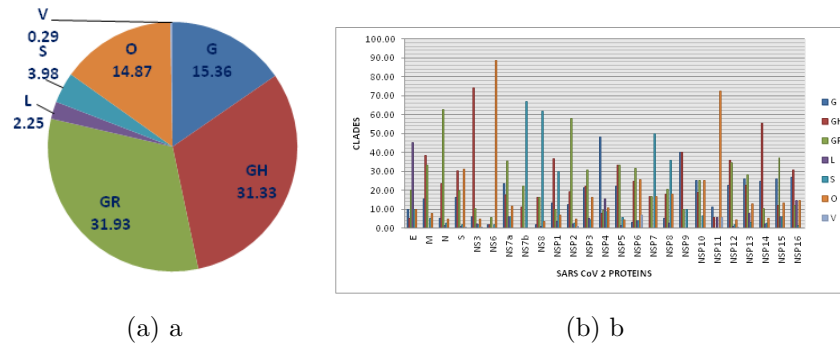

Figure 3: Quantitative analysis of clade-wise non-synonymous mutation. (a) Percentage of non-synonymous mutations found in different clades; (b) Clade-wise percentage of non-synonymous mutations occurred in different protein regions

Table 3: Clade-wise segregation of mutated data

| PROTEIN               | G           | GH          | GR          | L          | S          | O          | V         |
|-----------------------|-------------|-------------|-------------|------------|------------|------------|-----------|
| E                     | 2           | 1           | 4           | 9          | 2          | 2          | 0         |
| M                     | 6           | 15          | 13          | 0          | 2          | 3          | 0         |
| N                     | 60          | 264         | 709         | 13         | 31         | 52         | 0         |
| NS3                   | 30          | 376         | 709         | 12         | 10         | 24         | 3         |
| NS6                   | 1           | 1           | 3           | 0          | 1          | 47         | 0         |
| NS7a                  | 4           | 3           |             | 1          | 1          | 2          | 0         |
| NS7b                  | 0           | 1           |             | 0          | 6          | 0          | 0         |
| NS8                   | 2           | 18          | 18          | 1          | 69         | 4          | 0         |
| NSP1                  | 4           | 11          |             | 1          | 9          | 2          | 0         |
| NSP10                 | 4           | 3           | 4           | 0          | 1          | 4          | 0         |
| NSP11                 | 2           | 1           |             | 1          | 0          | 13         | 1         |
| NSP12                 | 241         | 383         | 366         | 9          | 18         | 45         | 3         |
| NSP13                 | 24          | 21          | 26          | 7          | 3          | 12         | 0         |
| NSP14                 | 49          | 109         | 20          | 4          | 5          | 10         | 0         |
| NSP15                 | 22          | 10          | 31          | 5          | 5          | 11         | 0         |
| NSP16                 | 20          | 23          | 9           | 11         | 1          | 11         | 0         |
| NSP2                  | 52          | 82          | 245         | 9          | 11         | 20         | 4         |
| NSP3                  | 109         | 114         | 156         | 27         | 21         | 82         | 0         |
| NSP4                  | 50          | 8           | 10          | 16         | 9          | 11         | 0         |
| NSP5                  | 16          | 24          | 24          | 1          | 4          | 3          | 0         |
| NSP6                  | 3           | 25          | 32          | 4          | 4          | 26         | 7         |
| NSP7                  | 0           | 1           | 1           | 0          | 3          | 1          | 0         |
| NSP8                  | 2           | 7           | 8           | 1          | 14         | 7          | 0         |
| NSP9                  | 4           | 4           | 1           | 0          | 1          | 0          | 0         |
| S                     | 317         | 583         | 384         | 18         | 34         | 599        | 1         |
| <b>TOTAL MUTATION</b> | <b>1024</b> | <b>2088</b> | <b>2128</b> | <b>150</b> | <b>265</b> | <b>991</b> | <b>19</b> |

127 mutations. In the isolates of clade G, GR, and O number of mutations at NSP10 are equal. Mutations  
 128 are also equally distributed in protein NSP5 of clades GH and GR.

### 129 3.2. Quantitative assessment of functional changes occur due to mutations

130 Structural changes in amino acids due to mutations lead to create functional instability of the isolates  
 131 themselves, cause vulnerable diseases and even increase the magnitude of virulence. In this subsection,  
 132 we have tried to find the impact of single point mutations on the biological function of proteins of  
 133 each isolates through the light of PROVEAN (Protein Variation Effect Analyzer) score, which may be  
 134 deleterious or neutral [35]. We have also calculated the change in Gibbs free energy ( $\Delta\Delta G$ ) occur due  
 135 to single point mutations as the difference in folding free energy change between wild type and mutant  
 136 protein ( $\Delta\Delta G$ ) is considered as an impact factor of protein stability changes [36]. The motivation here  
 137 is to understand the effect of those mutations on protein stability. The quantitative analysis will give  
 138 an insight into the probable mutations that occur in a particular clade and the magnitude of virulence  
 139 of them. It is to be noted that here we have excluded the mutations which are occurred only once. The  
 140 deleterious mutations are shown in Table 4. It is observed at Table 4 that if we consider the dataset as  
 141 a whole, then among structural proteins the mutations occurred in spike protein(s) are more deleterious  
 142 than others. Among the accessory proteins, NS3 is affected the most. NSP2, NSP5, and NSP12 are  
 143 the non-structural proteins that have most of the deleterious mutations that occurred. Furthermore,  
 144 we have calculated clade-wise percentage of deleterious mutations that occurred in different protein  
 145 regions. To do so, we have segregated each deleterious mutation occurred in ten different countries



Table 4: Investigate the deleterious mutations in total dataset.

| PROTEIN | DELETERIOUS MUTATION | PROVEAN SCORE | PROTEIN | DELETERIOUS MUTATION | PROVEAN SCORE |
|---------|----------------------|---------------|---------|----------------------|---------------|
| S       | D936Y                | -2.60         | NSP2    | T85I                 | -4.09         |
| S       | L752R                | -3.84         | NSP2    | F368V                | -2.69         |
| S       | A288P                | -2.80         | NSP2    | G339S                | -3.13         |
| S       | C851W                | -10.16        | NSP2    | P129S                | -3.17         |
| S       | D820N                | -4.67         | NSP2    | E309A                | -3.33         |
| S       | E725K                | -3.75         | NSP3    | A1914D               | -3.8          |
| S       | G648R                | -4.093        | NSP3    | P1558L               | -4.532        |
| S       | G669R                | -3.58         | NSP4    | L111S                | -1.54         |
| S       | L533K                | -2.62         | NSP4    | G309C                | -6.73         |
| S       | L916F                | -3.74         | NSP5    | P108S                | -4.53         |
| S       | P863H                | -5.12         | NSP5    | I106S                | -4.41         |
| S       | R905S                | -5.62         | NSP5    | L75F                 | -3.79         |
| S       | S758I                | -4.13         | NSP5    | N142L                | -4.3          |
| S       | S875F                | -3.37         | NSP5    | R279C                | -6.46         |
| S       | T716P                | -3.347        | NSP6    | G277S                | -6            |
| S       | T874P                | -5.59         | NSP6    | H64N                 | -2.97         |
| S       | V534G                | -3.12         | NSP12   | D303G                | -6.05         |
| N       | S193I                | -2.76         | NSP1    | W161L                | -7.8          |
| N       | S194L                | -4.27         | NSP13   | R392C                | -2.73         |
| N       | R191L                | -3.27         | NSP14   | T113I                | -4.25         |
| N       | S180L                | -3.40         | NSP15   | M330T                | -5.62         |
| PROTEIN | DELETERIOUS MUTATION | PROVEAN SCORE | NSP16   | R287I                | -2.54         |
| NS3     | Q57H                 | -3.286        | NSP16   | P12S                 | -7.73         |
| NS3     | G251V                | -8.58         | NSP16   | G77R                 | -7.35         |
| NS3     | D155Y                | -6.83         | NSP12   | T803I                | -3.55         |
| NS3     | G172C                | -6.75         | NSP12   | M124I                | -3.048        |
| NS3     | G172V                | -6.76         | NSP12   | P227S                | -6.00         |
| NS3     | N257D                | -3.286        | NSP12   | S607I                | -2.83         |
| NS3     | G251V                | -8.58         | NSP12   | A97V                 | -3.61         |
| NS3     | W45R                 | -8.87         |         |                      |               |
| NS7a    | E95K                 | -2.61         |         |                      |               |
| NS7a    | P45L                 | -10           |         |                      |               |
| NS7a    | V104F                | -2.83         |         |                      |               |
| NS8     | P38R                 | -8.5          |         |                      |               |

146 along with their clades Table 5. The (Fig. 4) shows the protein regions that are mostly affected  
 147 by the deleterious mutations. Maximum deleterious mutations occurred in structural and accessory  
 148 proteins belong to clade GH. Most of the deleterious mutations in non-structural protein regions are  
 149 occurred in the isolates of both clades GH and GR. The isolates of clade V are rare and only found in  
 150 the isolates of China and Thailand, but interestingly it is observed that few of deleterious mutations  
 151 are also enlisted there. (Fig.4) depicts the fact that most of the deleterious mutations take place in  
 152 amino acid sequences of clade GH. It is reported that the human genome may carry large numbers of  
 153 deleterious mutations which as a whole make a significant contribution to fatal diseases. Identification  
 154 and analysis of deleterious mutations can shade lights on personalized treatment and medicine [37].  
 155 Hence, the identification of these kinds of mutations in SARS-CoV-2 isolates and their impacts on the  
 156 host body seek attention of virologists.

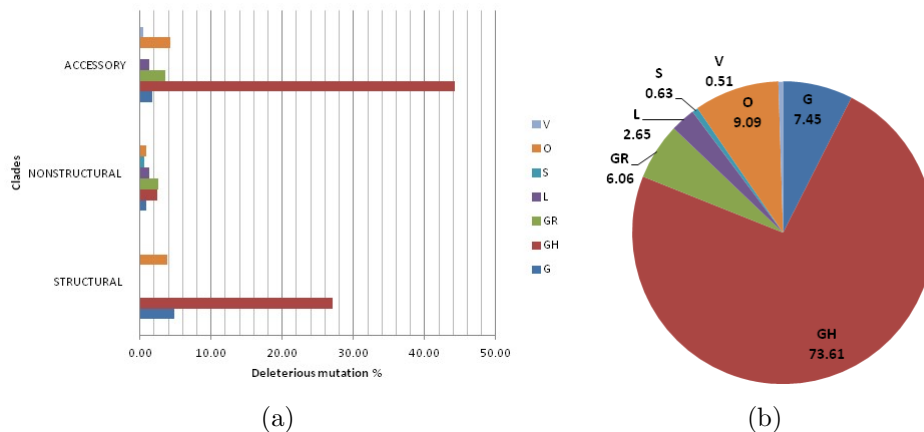

Figure 4: Quantification of clade-wise deleterious non-synonymous mutation. (a) Clade-wise percentage of deleterious non-synonymous mutations in different protein regions; (b) Clade-wise calculations of deleterious non-synonymous mutations of total data set

Table 5: Clade-wise clustering of deleterious mutations in total dataset.

| MUTATION | G  | GH  | GR | L | S | O  | V | MUTATION | G | GH | GR | L | S | O | V |
|----------|----|-----|----|---|---|----|---|----------|---|----|----|---|---|---|---|
| S193I    | 1  | 7   | 0  | 0 | 0 | 0  | 0 | V104F    | 0 | 2  | 0  | 0 | 0 | 0 | 0 |
| S194L    | 21 | 190 | 0  | 0 | 0 | 2  | 0 | P38R     | 0 | 0  | 3  | 0 | 0 | 0 | 0 |
| R191L    | 2  | 0   | 0  | 0 | 0 | 0  | 0 | W161L    | 1 | 1  | 0  | 0 | 0 | 0 | 0 |
| S180L    | 1  | 1   | 0  | 0 | 0 | 0  | 0 | R392C    | 0 | 0  | 2  | 0 | 0 | 0 | 0 |
| D936Y    | 1  | 1   | 0  | 0 | 0 | 0  | 0 | T113I    | 0 | 0  | 0  | 1 | 0 | 4 | 0 |
| L752R    | 0  | 0   | 0  | 0 | 0 | 2  | 0 | M330T    | 0 | 0  | 2  | 0 | 0 | 0 | 0 |
| A288P    | 0  | 0   | 0  | 0 | 0 | 3  | 0 | R287I    | 0 | 0  | 3  | 0 | 0 | 0 | 0 |
| C851W    | 1  | 0   | 0  | 0 | 0 | 1  | 0 | P12S     | 0 | 0  | 0  | 4 | 0 | 0 | 0 |
| D820N    | 0  | 0   | 0  | 0 | 0 | 2  | 0 | G77R     | 0 | 0  | 0  | 3 | 0 | 1 | 0 |
| E725K    | 0  | 0   | 0  | 0 | 0 | 2  | 0 | T85I     | 0 | 0  | 0  | 0 | 0 | 0 | 0 |
| G648R    | 1  | 0   | 0  | 0 | 0 | 3  | 0 | F368V    | 1 | 1  | 0  | 0 | 0 | 0 | 0 |
| G669R    | 0  | 0   | 0  | 0 | 0 | 4  | 0 | G339S    | 0 | 0  | 0  | 1 | 0 | 0 | 0 |
| L533K    | 0  | 0   | 0  | 0 | 0 | 2  | 0 | P129S    | 0 | 0  | 3  | 0 | 0 | 0 | 0 |
| L916F    | 1  | 0   | 0  | 0 | 0 | 1  | 0 | E309A    | 1 | 1  | 0  | 0 | 0 | 0 | 0 |
| P863H    | 4  | 15  | 0  | 0 | 0 | 0  | 0 | A1914D   | 2 | 3  | 0  | 0 | 0 | 0 | 0 |
| R905S    | 2  | 0   | 0  | 0 | 0 | 0  | 0 | P1558L   | 0 | 0  | 3  | 2 | 0 | 2 | 0 |
| S758I    | 2  | 0   | 0  | 0 | 0 | 0  | 0 | L111S    | 0 | 0  | 0  | 0 | 5 | 0 | 0 |
| S875F    | 1  | 0   | 0  | 0 | 0 | 2  | 0 | G309C    | 1 | 2  | 0  | 0 | 0 | 0 | 0 |
| T716P    | 0  | 0   | 0  | 0 | 0 | 2  | 0 | P108S    | 0 | 0  | 7  | 0 | 0 | 0 | 0 |
| T874P    | 0  | 0   | 0  | 0 | 0 | 3  | 0 | I106S    | 0 | 0  | 2  | 0 | 0 | 0 | 0 |
| V534G    | 0  | 0   | 0  | 0 | 0 | 2  | 0 | L75F     | 1 | 2  | 0  | 0 | 0 | 0 | 0 |
| Q57H     | 12 | 342 | 7  | 0 | 0 | 7  | 0 | N142L    | 0 | 5  | 0  | 0 | 0 | 0 | 0 |
| G251V    | 0  | 0   | 0  | 0 | 0 | 5  | 4 | R279C    | 0 | 2  | 0  | 0 | 0 | 0 | 0 |
| D155Y    | 0  | 2   | 5  | 0 | 0 | 0  | 0 | G277S    | 0 | 2  | 0  | 0 | 0 | 0 | 0 |
| G172C    | 0  | 0   | 3  | 0 | 0 | 0  | 0 | H64N     | 1 | 1  | 0  | 0 | 0 | 0 | 0 |
| G172V    | 0  | 0   | 3  | 0 | 0 | 0  | 0 | D303G    | 0 | 0  | 2  | 0 | 0 | 0 | 0 |
| N257D    | 1  | 1   | 0  | 0 | 0 | 0  | 0 | T803I    | 0 | 0  | 2  | 0 | 0 | 0 | 0 |
| W45R     | 0  | 0   | 0  | 7 | 0 | 0  | 0 | M124I    | 0 | 0  | 3  | 0 | 0 | 0 | 0 |
| E95K     | 1  | 1   | 0  | 0 | 0 | 0  | 0 | P227S    | 0 | 0  | 2  | 0 | 0 | 0 | 0 |
| P45L     | 0  | 2   | 0  | 0 | 0 | 0  | 0 | S607I    | 0 | 0  | 2  | 0 | 0 | 0 | 0 |
| A97V     | 0  | 0   | 0  | 3 | 0 | 22 | 0 |          |   |    |    |   |   |   |   |

157 Table 6 gives us a microscopic view of the severity of the mutations that occurred in the dataset  
158 taken. In 82% of deleterious mutations protein stability has been decreased due to single point mutation.  
159 It is already observed that maximum mutations have occurred in the isolates which belong to clade  
160 GH. Out of 18 deleterious mutations happened in isolates from clade GH in 15 isolates (S194L, D936Y,  
161 P863H, W161L, F368V, E309A, A1914D, G309C, L75F, H64N, Q57H, N257D, E95K, P45L, V104F)  
162 stability have been decreased due to mutations. It can be observed at Table 7 that due to mutations  
163 majorly amino acid Glutamine and Serine are affected. Glutamine(Q) has been changed to Histidine(H),  
164 and Serine(S) changed to Leucine(L). The result may indicate that in Asian countries SARS-CoV-2  
165 isolates responsible for COVID-19 majorly belong to the clades GR and GH. Among them mutations  
166 that occurred in isolates of clade GH are deleterious in nature, so have an impact on the biological  
167 function of proteins. The mutations also change the structural stability of proteins by making changes  
168 in free energy( $\Delta G$ ).

Table 6: Investigating Stability of deleterious mutations in total dataset.

| Mutation type | Mutation    | Stability | $\Delta\Delta G$ | Mutation type | Mutation    | Stability | $\Delta\Delta G$ |
|---------------|-------------|-----------|------------------|---------------|-------------|-----------|------------------|
| S194L         | Deleterious | Decreased | -0.47            | G77R          | Deleterious | Decreased | -0.65            |
| D936Y         | Deleterious | Decreased | -0.35            | T85I          | Deleterious | Decreased | -0.91            |
| L752R         | Deleterious | Decreased | -1.39            | F368V         | Deleterious | Decreased | -1.74            |
| C851W         | Deleterious | Decreased | -0.09            | G339S         | Deleterious | Decreased | -1.2             |
| D820N         | Deleterious | Decreased | -1.25            | P129S         | Deleterious | Decreased | -1.82            |
| E725K         | Deleterious | Decreased | -0.35            | E309A         | Deleterious | Decreased | -0.96            |
| G648R         | Deleterious | Decreased | -0.6             | A1914D        | Deleterious | Decreased | -0.68            |
| G669R         | Deleterious | Decreased | -0.14            | P1558L        | Deleterious | Decreased | -0.36            |
| L533K         | Deleterious | Decreased | -1.81            | L111S         | Deleterious | Decreased | -2.29            |
| L916F         | Deleterious | Decreased | -1.12            | G309C         | Deleterious | Decreased | -1.07            |
| P863H         | Deleterious | Decreased | -1.44            | P108S         | Deleterious | Decreased | -1.73            |
| R905S         | Deleterious | Decreased | -1.18            | I106S         | Deleterious | Decreased | -2.24            |
| T716P         | Deleterious | Decreased | -0.8             | L75F          | Deleterious | Decreased | -1.09            |
| T874P         | Deleterious | Decreased | -0.22            | R279C         | Deleterious | Decreased | -0.67            |
| V534G         | Deleterious | Decreased | -2.029           | G277S         | Deleterious | Decreased | -1.3             |
| Q57H          | Deleterious | Decreased | -0.9             | H64N          | Deleterious | Decreased | -0.03            |
| G251V         | Deleterious | Decreased | -0.54            | D303G         | Deleterious | Decreased | -0.9             |
| G172C         | Deleterious | Decreased | -0.83            | M124I         | Deleterious | Decreased | -0.53            |
| G172V         | Deleterious | Decreased | -0.41            | P227S         | Deleterious | Decreased | -1.49            |
| N257D         | Deleterious | Decreased | -0.21            | S193I         | Deleterious | Increased | -0.29            |
| W45R          | Deleterious | Decreased | -1.05            | R191L         | Deleterious | Increased | -0.26            |
| E95K          | Deleterious | Decreased | -0.58            | S180L         | Deleterious | Increased | -0.12            |
| P45L          | Deleterious | Decreased | -0.71            | A288P         | Deleterious | Increased | -0.29            |
| V104F         | Deleterious | Decreased | -1.47            | S758I         | Deleterious | Increased | 0.43             |
| P38R          | Deleterious | Decreased | -0.9             | S875F         | Deleterious | Increased | 0.66             |
| W161L         | Deleterious | Decreased | -0.51            | D155Y         | Deleterious | Increased | 0.21             |
| R392C         | Deleterious | Decreased | -1.29            | N142L         | Deleterious | Increased | -0.05            |
| T113I         | Deleterious | Decreased | -0.43            | T803I         | Deleterious | Increased | 0.18             |
| M330T         | Deleterious | Decreased | -1               | S607I         | Deleterious | Increased | 0.37             |
| R287I         | Deleterious | Decreased | -0.66            | A97V          | Deleterious | Increased | -0.31            |
| P12S          | Deleterious | Decreased | -1.29            |               |             |           |                  |

Table 7: Amino Acid changed due to deleterious mutations taken place.

| MUTATION | COUNT | MUTATION          | COUNT |
|----------|-------|-------------------|-------|
| Q>H      | 368   | M>I               | 3     |
| S>L      | 215   | P>R               | 3     |
| A>V      | 25    | R>I               | 3     |
| P>H      | 19    | S>F               | 3     |
| P>S      | 16    | C>W               | 2     |
| G>R      | 12    | D>G               | 2     |
| G>V      | 12    | D>N               | 2     |
| S>I      | 12    | E>A               | 2     |
| P>L      | 9     | E>L               | 2     |
| T>I      | 9     | F>V               | 2     |
| D>Y      | 9     | H>N               | 2     |
| W>R      | 7     | I>S               | 2     |
| G>C      | 6     | L>K               | 2     |
| A>D      | 5     | L>R               | 2     |
| L>F      | 5     | L>S               | 2     |
| N>L      | 5     | M>T               | 2     |
| T>P      | 5     | N>D               | 2     |
| E>K      | 4     | R <sub>i</sub> >L | 2     |
| R>C      | 4     | R>S               | 2     |
| A>P      | 3     | V>F               | 2     |
| G>S      | 3     | V>G               | 2     |

#### 169 4. Conclusions

170 The in silico analysis performed in this study states that the isolates in ten Asian countries are from  
171 clades G, GH, GR, L, S, O, and V. It indicates the diversity of the infection indeed. O, GH, and GR are  
172 the most widely affected ancestors of isolates among them. But when there is a talk about mutations,  
173 31.93% of total mutations have taken place in the isolates of clade GR, and 31.33% of the mutations  
174 from GH. Hence, number of mutations are really high in the isolates belong to both the clades. When  
175 clades G, GH, and GR traversed almost in all countries specified here, the isolates of clade V are  
176 affected rarely. The most frequently mutated amino acids are Glutamine and Serine. In most of the  
177 cases glutamine is changed into Histidine and serine is changed to Leucine. It is to be noted that  
178 both the mutations are deleterious and the isolates of clade GH carry the major deleterious mutation



179 load (44.19% of the total dataset). The majority of mutations taken place in the isolates of clade GH  
180 are deleterious in nature. 82% of deleterious mutations are unstable and so their biological functions  
181 are affected. As a whole in this present work, the investigation provides us clade-wise characteristics  
182 of the SARS-CoV-2 strains of the Asian continent. When reported research papers shed the light on  
183 development of clade-specific vaccines [31], our analysis can encourage drug designers for development  
184 of customized drugs or vaccines for Asian continent in order to combat COVID-19.

## 185 References

- 186 [1] R. Sanjuán, P. Domingo-Calap, Mechanisms of viral mutation, *Cellular and molecular life sciences*  
187 73 (2016) 4433–4448.
- 188 [2] J. K. Das, A. Sengupta, P. P. Choudhury, S. Roy, Mapping sequence to feature vector using  
189 numerical representation of codons targeted to amino acids for alignment-free sequence analysis,  
190 *Gene* 766 (2020) 145096.
- 191 [3] D. Silvestro, A. Antonelli, N. Salamin, T. B. Quental, The role of clade competition in the  
192 diversification of north american canids, *Proceedings of the National Academy of Sciences* 112  
193 (2015) 8684–8689.
- 194 [4] W. Tyor, C. Fritz-French, A. Nath, Effect of hiv clade differences on the onset and severity of  
195 hiv-associated neurocognitive disorders, *Journal of neurovirology* 19 (2013) 515–522.
- 196 [5] S. U. Kumar, D. T. Kumar, B. P. Christopher, C. Doss, The rise and impact of covid-19 in india,  
197 *Frontiers in Medicine* 7 (2020) 250.
- 198 [6] Y. Li, X. Yang, N. Wang, H. Wang, B. Yin, X. Yang, W. Jiang, The divergence between sars-cov-2  
199 and ratg13 might be overestimated due to the extensive rna modification, *Future Virology* (2020).
- 200 [7] M. L. DeDiego, L. Pewe, E. Alvarez, M. T. Rejas, S. Perlman, L. Enjuanes, Pathogenicity of  
201 severe acute respiratory coronavirus deletion mutants in hacc-2 transgenic mice, *Virology* 376  
202 (2008) 379–389.
- 203 [8] K. G. Andersen, A. Rambaut, W. I. Lipkin, E. C. Holmes, R. F. Garry, The proximal origin of  
204 sars-cov-2, *Nature medicine* 26 (2020) 450–452.
- 205 [9] R. Zeng, R.-F. Yang, M.-D. Shi, M.-R. Jiang, Y.-H. Xie, H.-Q. Ruan, X.-S. Jiang, L. Shi, H. Zhou,  
206 L. Zhang, et al., Characterization of the 3a protein of sars-associated coronavirus in infected vero  
207 e6 cells and sars patients, *Journal of molecular biology* 341 (2004) 271–279.
- 208 [10] A. C. Walls, Y.-J. Park, M. A. Tortorici, A. Wall, A. T. McGuire, D. Velesler, Structure, function,  
209 and antigenicity of the sars-cov-2 spike glycoprotein, *Cell* (2020).
- 210 [11] A. Maitra, M. C. Sarkar, H. Raheja, N. K. Biswas, S. Chakraborti, A. K. Singh, S. Ghosh, S. Sarkar,  
211 S. Patra, R. K. Mondal, et al., Mutations in sars-cov-2 viral rna identified in eastern india: Possible  
212 implications for the ongoing outbreak in india and impact on viral structure and host susceptibility,  
213 *Journal of Biosciences* 45 (2020).
- 214 [12] N. K. Biswas, P. P. Majumder, Analysis of rna sequences of 3636 sars-cov-2 collected from 55  
215 countries reveals selective sweep of one virus type, *Indian J. Med. Res* (2020).
- 216 [13] R. Kumar, H. Verma, N. Singhvi, U. Sood, V. Gupta, M. Singh, R. Kumari, P. Hira, S. Nagar,  
217 C. Talwar, et al., Comparative genomic analysis of rapidly evolving sars-cov-2 reveals mosaic  
218 pattern of phylogeographical distribution, *Msystems* 5 (2020).
- 219 [14] D. DiMaio, D. Nathans, Regulatory mutants of simian virus 40: effect of mutations at a t antigen  
220 binding site on dna replication and expression of viral genes, *Journal of molecular biology* 156  
221 (1982) 531–548.

- 222 [15] A. Banerjee, R. Sarkar, S. Mitra, M. Lo, S. Dutta, M. Chawla-Sarkar, The novel coronavirus  
223 enigma: Phylogeny and analyses of coevolving mutations among the sars-cov-2 viruses circulating  
224 in india, *JMIR Bioinformatics and Biotechnology* 1 (2020) e20735.
- 225 [16] E. Foy, K. Li, C. Wang, R. Sumpter, M. Ikeda, S. M. Lemon, M. Gale, Regulation of interferon  
226 regulatory factor-3 by the hepatitis c virus serine protease, *Science* 300 (2003) 1145–1148.
- 227 [17] I. Astuti, et al., Severe acute respiratory syndrome coronavirus 2 (sars-cov-2): An overview of  
228 viral structure and host response, *Diabetes & Metabolic Syndrome: Clinical Research & Reviews*  
229 (2020).
- 230 [18] M. Eaaswarkhanth, A. Al Madhoun, F. Al-Mulla, Could the d614 g substitution in the sars-cov-2  
231 spike (s) protein be associated with higher covid-19 mortality?, *International Journal of Infectious*  
232 *Diseases* (2020).
- 233 [19] S. S. Hassan, P. P. Choudhury, P. Basu, S. S. Jana, Molecular conservation and differential  
234 mutation on orf3a gene in indian sars-cov2 genomes, *Genomics* (2020).
- 235 [20] B. K. Kumar, A. Rohit, K. S. Prithvisagar, P. Rai, I. Karunasagar, I. Karunasagar, Deletion in  
236 the c-terminal region of the envelope glycoprotein in some of the indian sars-cov-2 genome, *Virus*  
237 *Research* (2020) 198222.
- 238 [21] R. Dutta, L. Buragohain, P. Borah, Analysis of codon usage of severe acute respiratory syndrome  
239 corona virus 2 (sars-cov-2) and its adaptability in dog, *Virus research* 288 (2020) 198113.
- 240 [22] I. Saha, N. Ghosh, D. Maity, N. Sharma, K. Mitra, Inferring the genetic variability in indian  
241 sars-cov-2 genomes using consensus of multiple sequence alignment techniques, *Infection, Genetics*  
242 *and Evolution* 85 (2020) 104522.
- 243 [23] S. S. Hassan, P. P. Choudhury, B. Roy, S. S. Jana, Missense mutations in sars-cov2 genomes from  
244 indian patients (2020).
- 245 [24] S. S. Hassan, P. P. Choudhury, B. Roy, Sars-cov2 envelope protein: non-synonymous mutations  
246 and its consequences (2020).
- 247 [25] J.-Y. Li, C.-H. Liao, Q. Wang, Y.-J. Tan, R. Luo, Y. Qiu, X.-Y. Ge, The orf6, orf8 and nucleocapsid  
248 proteins of sars-cov-2 inhibit type i interferon signaling pathway, *Virus research* 286 (2020) 198074.
- 249 [26] S. Weber, C. Ramirez, W. Doerfler, Signal hotspot mutations in sars-cov-2 genomes evolve as  
250 the virus spreads and actively replicates in different parts of the world, *Virus research* 289 (2020)  
251 198170.
- 252 [27] L. Li, T. Sun, Y. He, W. Li, Y. Fan, J. Zhang, Epitope-based peptide vaccines predicted against  
253 novel coronavirus disease caused by sars-cov-2, *BioRxiv* (2020).
- 254 [28] Q. Nie, X. Li, W. Chen, D. Liu, Y. Chen, H. Li, D. Li, M. Tian, W. Tan, J. Zai, Phylogenetic and  
255 phylodynamic analyses of sars-cov-2, *Virus research* 287 (2020) 198098.
- 256 [29] M. Seyran, D. Pizzol, P. Adadi, T. M. A. El-Aziz, S. S. Hassan, A. Soares, R. Kandimalla, K. Lund-  
257 strom, M. Tambuwala, A. A. Aljabali, et al., Questions concerning the proximal origin of sars-cov-2,  
258 *Journal of Medical Virology* (2020).
- 259 [30] D. Mercatelli, F. M. Giorgi, Geographic and genomic distribution of sars-cov-2 mutations (2020).
- 260 [31] C. Yi, X. Sun, J. Ye, L. Ding, M. Liu, Z. Yang, X. Lu, Y. Zhang, L. Ma, W. Gu, et al., Key  
261 residues of the receptor binding motif in the spike protein of sars-cov-2 that interact with ace2 and  
262 neutralizing antibodies, *Cellular & Molecular Immunology* (2020) 1–10.

- 263 [32] K. Boonnak, Y. Matsuoka, W. Wang, A. L. Suguitan, Z. Chen, M. Paskel, M. Baz, I. Moore,  
264 H. Jin, K. Subbarao, Development of clade-specific and broadly reactive live attenuated influenza  
265 virus vaccines against rapidly evolving h5 subtype viruses, *Journal of Virology* 91 (2017).
- 266 [33] Y. Choi, A. P. Chan, Provean web server: a tool to predict the functional effect of amino acid  
267 substitutions and indels, *Bioinformatics* 31 (2015) 2745–2747.
- 268 [34] E. Capriotti, P. Fariselli, R. Casadio, I-mutant2. 0: predicting stability changes upon mutation  
269 from the protein sequence or structure, *Nucleic acids research* 33 (2005) W306–W310.
- 270 [35] Y. Choi, G. E. Sims, S. Murphy, J. R. Miller, A. P. Chan, Predicting the functional effect of amino  
271 acid substitutions and indels, *PloS one* 7 (2012) e46688.
- 272 [36] E. Capriotti, P. Fariselli, I. Rossi, R. Casadio, A three-state prediction of single point mutations  
273 on protein stability changes, *BMC bioinformatics* 9 (2008) S6.
- 274 [37] S. Chun, J. C. Fay, Identification of deleterious mutations within three human genomes, *Genome*  
275 *research* 19 (2009) 1553–1561.

## 276 **Competing interests**

277 The authors declare no competing interests.

## 278 **Supporting information**

279 *Table S1.* The following is Supplementary data to this article:
